# Supplementary material for: Genomic surveillance of Escherichia coli ST131 identifies local expansion and serial replacement of subclones
Source: PubMed Central journal article supplement (PMC7276707; doi:10.1099/mgen.0.000352), 2020-03-26
Supplement: mgen-6-352-s001.pdf [file mgen-6-352-s001.pdf]

## Supplementary Figures

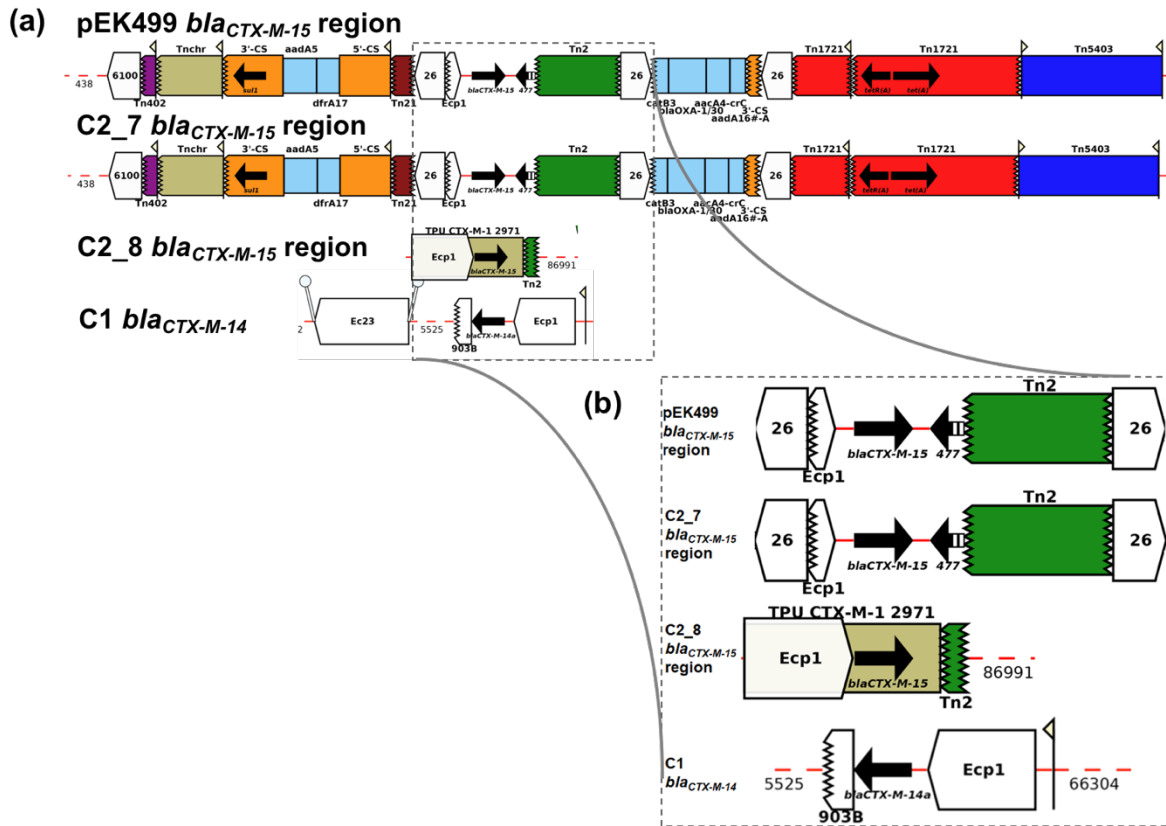

**Supplementary Figure 1. Flanking genetic elements of *bla*<sub>CTX-M</sub> genes in pEK499 and in the chromosome or plasmid-derived contig of C2\_7, C2\_8 and C1 strains.** A *bla*<sub>CTX-M-15</sub> element on the IncFII/FIA pEK499 reference and in subclade C2\_7, a chromosomal *bla*<sub>CTX-M-15</sub> gene in C2\_8 isolates and a *bla*<sub>CTX-M-14</sub> element on IncFII subclade C1 plasmid (a). The region encoding *bla*<sub>CTX-M-14</sub> and *bla*<sub>CTX-M-15</sub> are highlighted in a black box. Arrows indicate the orientation of features, with the forward direction defined as the direction of transcription for genes, towards the main part of the attC site for cassettes, in integrons towards attI for 5' flanking regions, away from the cassette array for 3'-flanking regions, relative to the direction of transcription of the transposase gene for insertion sequences and transposons (Tn) (ie, inverted repeat left to inverted repeat right) and to the direction of the reverse transcriptase for Group II introns. The missing end of a feature is shown by a zig-zag line. The inset represents the area bound by the dashed line and is shown in more detail in (b).

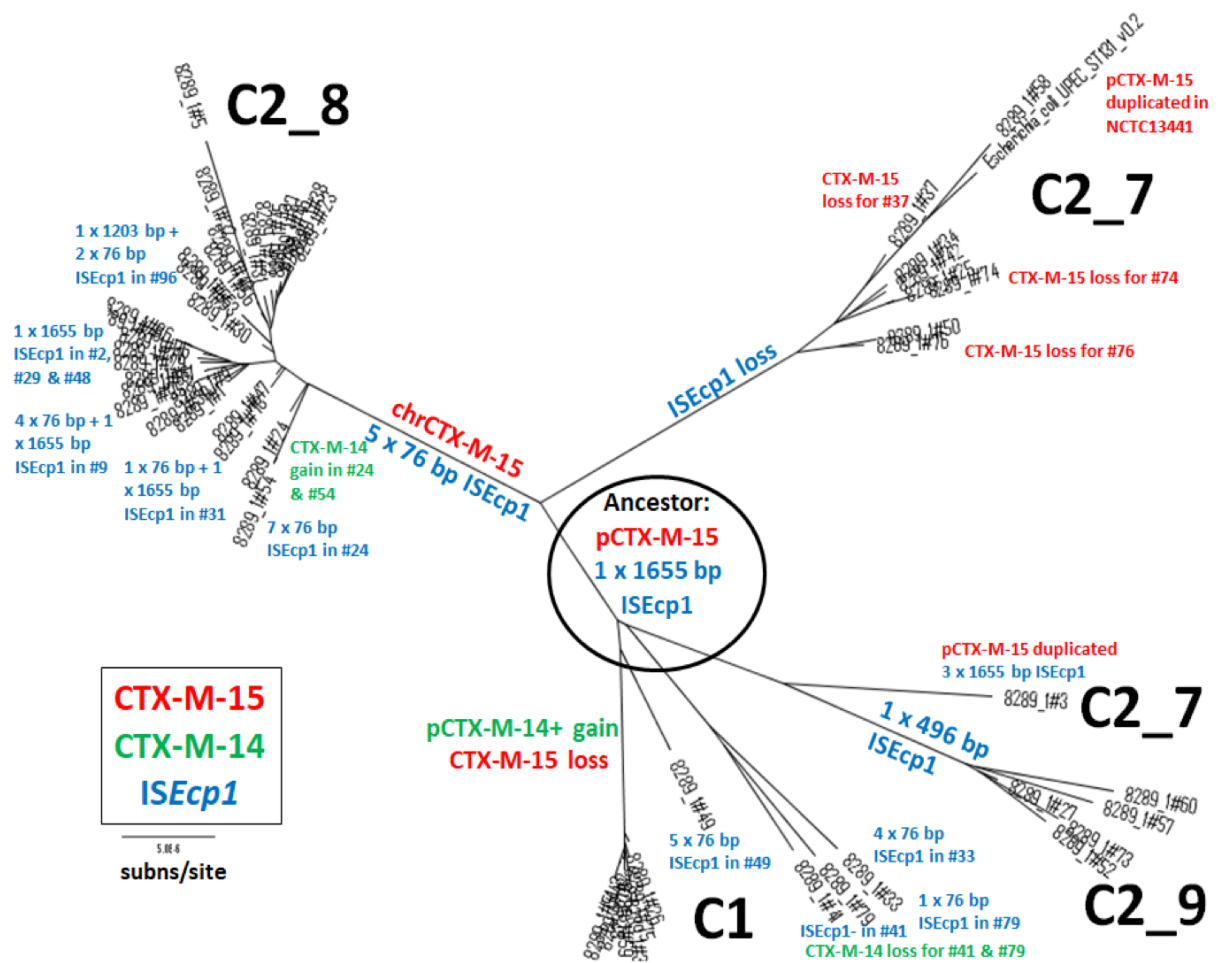

**Supplementary figure 2. Phylogenetic reconstruction of N=54 ST131 strains collected from Irish long-term care facilities.** A phylogenomic network of the 54 Irish Clade C samples' chromosomal mutational SNPs built using RAxML and ClonalframeML and drawn with FigTree v.1.4.3. The phylogeny of the n=54 was rooted using the topology of n=794, which C1 as the most divergent lineage, with C2\_9 diverging next, followed by C2\_8 and C2\_7, though here the smaller sample size meant that the ancestral lineage was unclear and so could be approximated by the C1-C2 origin, where the ancestor likely had a plasmid with a 1,655 bp *ISEcp1* 5' of a *bla<sub>CTX-M-15</sub>* gene. The *bla<sub>CTX-M-15</sub>* gene changes are in red, the *bla<sub>CTX-M-14</sub>* gene mutations are in green, and the *ISEcp1* differences are in blue. The subclades C1, C2\_7, C2\_8 and C2\_9 are shown, and the scale bar shows five substitutions per Mb.

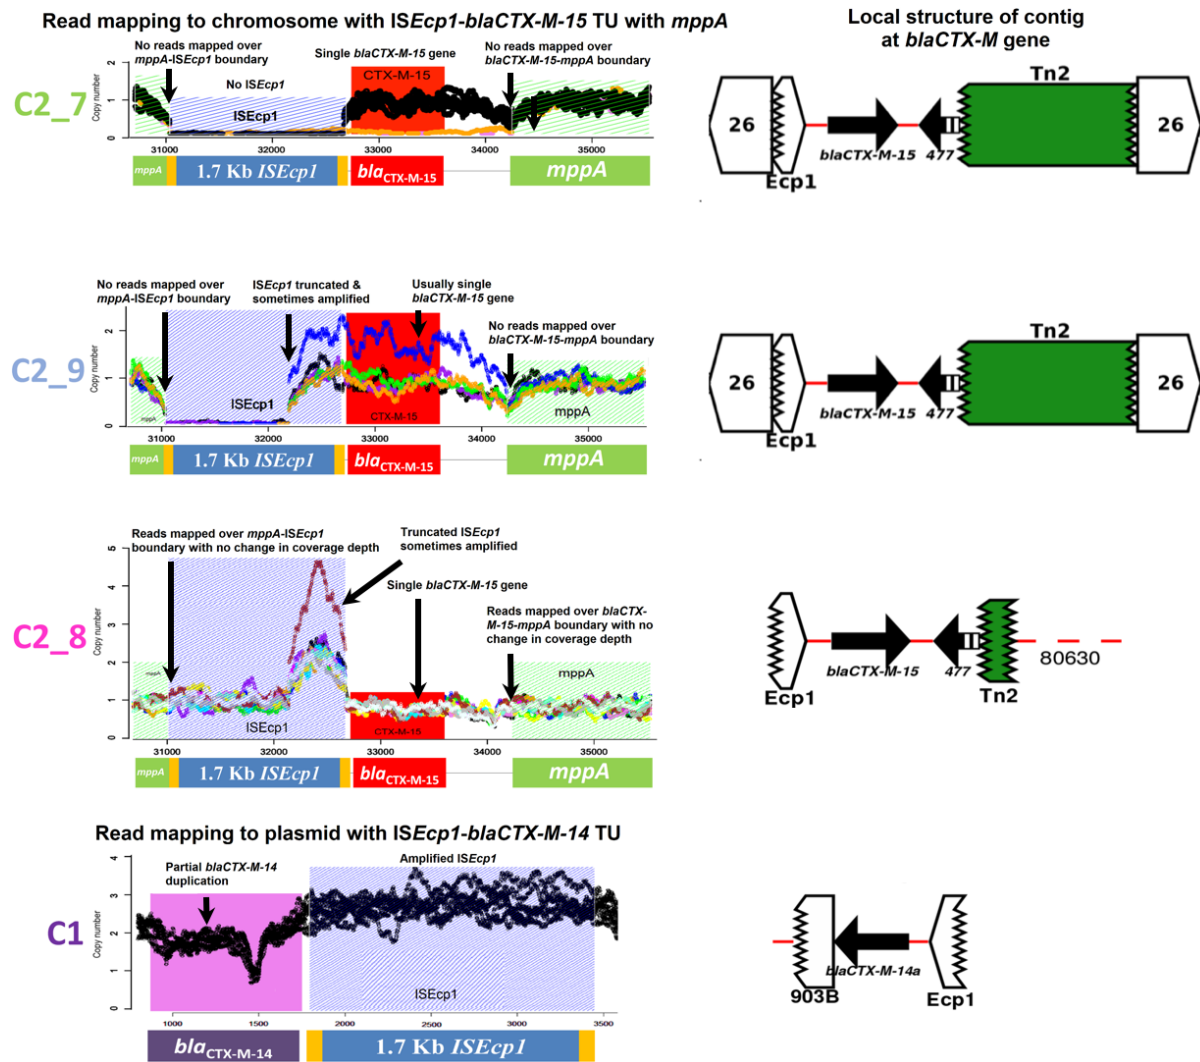

**Supplementary Figure 3. Genomic context of *bla*<sub>CTX-M</sub> genes in C2\_7, C2\_9, C2\_8 and C1 isolates.** Read mapping copy numbers for 33 of the 54 the Irish isolates from C2\_7 (n=6 shown), C2\_9 (all n=5 shown), C2\_8 (n=15 shown) and C1 (n=7 shown) across *ISEcp1* elements (blue), the *bla*<sub>CTX-M-15</sub> gene (red), the *bla*<sub>CTX-M-14</sub> gene (pink) or the *mppA* gene (green). C2\_8 all had consistent coverage of the chromosomally inserted TU isoform *ISEcp1-bla*<sub>CTX-M-15</sub>-shortTn2 spanning *mppA* and typically had with *ISEcp1* fragments of 1,203 bp, 529 bp, 76 bp and 76 bp. The C2\_9 isolates had a 496 bp *ISEcp1* element and a *bla*<sub>CTX-M-15</sub> gene. Most C2\_7 isolates had no *ISEcp1* and one *bla*<sub>CTX-M-15</sub> gene. C1 had the TU isoform p\_*ISEcp1-bla*<sub>CTX-M-14</sub>-IS903B with a duplicated *ISEcp1* element and duplicated *bla*<sub>CTX-M-14</sub> gene. Reads from non-C2\_8 libraries mapped at *mppA* in the TU isoform, but with gaps indicating no contiguous mapping to the *bla*<sub>CTX-M-15</sub> gene.

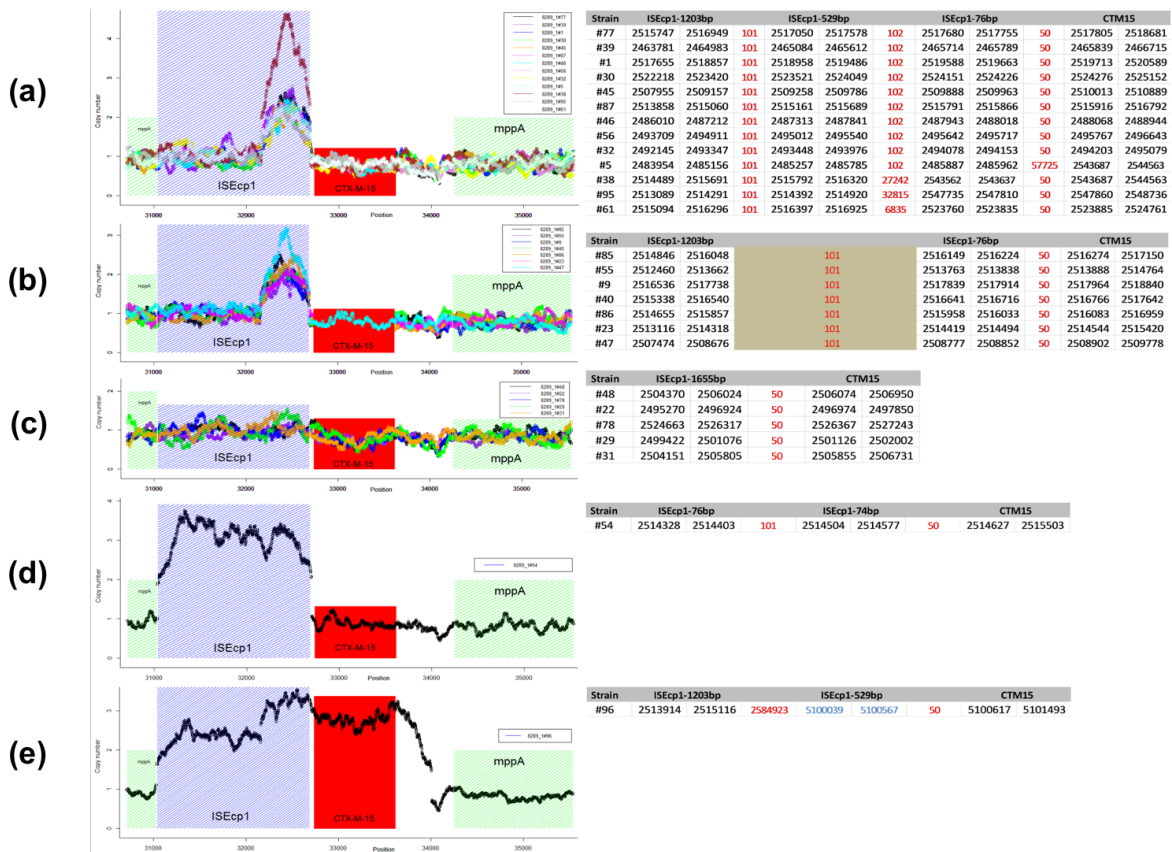

**Supplementary Figure 4. C2\_8 isolates with a chromosomal ISEcp1-*bla*<sub>CTX-M-15</sub> at the *mppA* gene.** Read mapping copy number for n=27 C2\_8 isolates showing that all had 1+ ISEcp1 elements (blue) 5' of a *bla*<sub>CTX-M-15</sub> gene (red) with consistent coverage spanning the *mppA* gene (green) including reads spanning each elements' breakpoints, with the TU isoform chr\_shortISEcp1-*bla*<sub>CTX-M-15</sub>-shortTn2. N=13 (a) had ISEcp1 fragments of 1,203 bp, 529 bp, 76 bp and 76 bp with one *bla*<sub>CTX-M-15</sub> gene, though within this some had one or two extra 76 bp ISEcp1 fragments on their plasmids, including 8289\_1#24 (ERR191657 in Table 3, not shown here) and 8289\_1#53 (not shown here). 8289\_1#24 had a *bla*<sub>CTX-M-14</sub> gene, and had 74-77 bp ISEcp1 fragments on its plasmid, as well as 76 bp, 529 bp and 1203 bp ISEcp1 segments on its chromosome. 8289\_1#5 (ERR191638) also had its *bla*<sub>CTX-M-15</sub> gene was 57,725 bp distant from the ISEcp1 fragments. 8289\_1#38 (ERR191671), 8289\_1#61 (ERR191694) and 8289\_1#95 (ERR191728) had a 76 bp ISEcp1 fragment adjacent to the chromosomal *bla*<sub>CTX-M-15</sub> gene at 27,742 bp (8289\_1#38), 6,835 bp (8289\_1#61) and 32,815 (8289\_1#95) from the other ISEcp1 copies, consistent with recombination between ISEcp1 segments. N=7 (b) were like this previous group, but without the 529 bp ISEcp1 fragment. Another set (n=5, third panel) had a full 1,655 bp ISEcp1 element with no fragmentation. One isolate (8289\_1#54) had three full 1,655 bp ISEcp1 elements on both its chromosome and plasmid, and fragments of 76 bp and 74 bp adjacent to the *bla*<sub>CTX-M-15</sub> gene (c). Finally, the strain ERR191729 (8289\_1#96) had three *bla*<sub>CTX-M-15</sub> gene copies and a first ISEcp1 fragment 529 bp where the TU was inverted and duplicated, and separate from a 1,203 bp ISEcp1 at *mppA*, suggesting that recombination between the chromosomal and plasmid ISEcp1 IRs may have transferred the *bla*<sub>CTX-M-15</sub> gene back to the plasmid (e). The tables (right) shows the ISEcp1 assembly coordinates, spacer DNA lengths and *bla*<sub>CTX-M-14</sub> assembly coordinates.

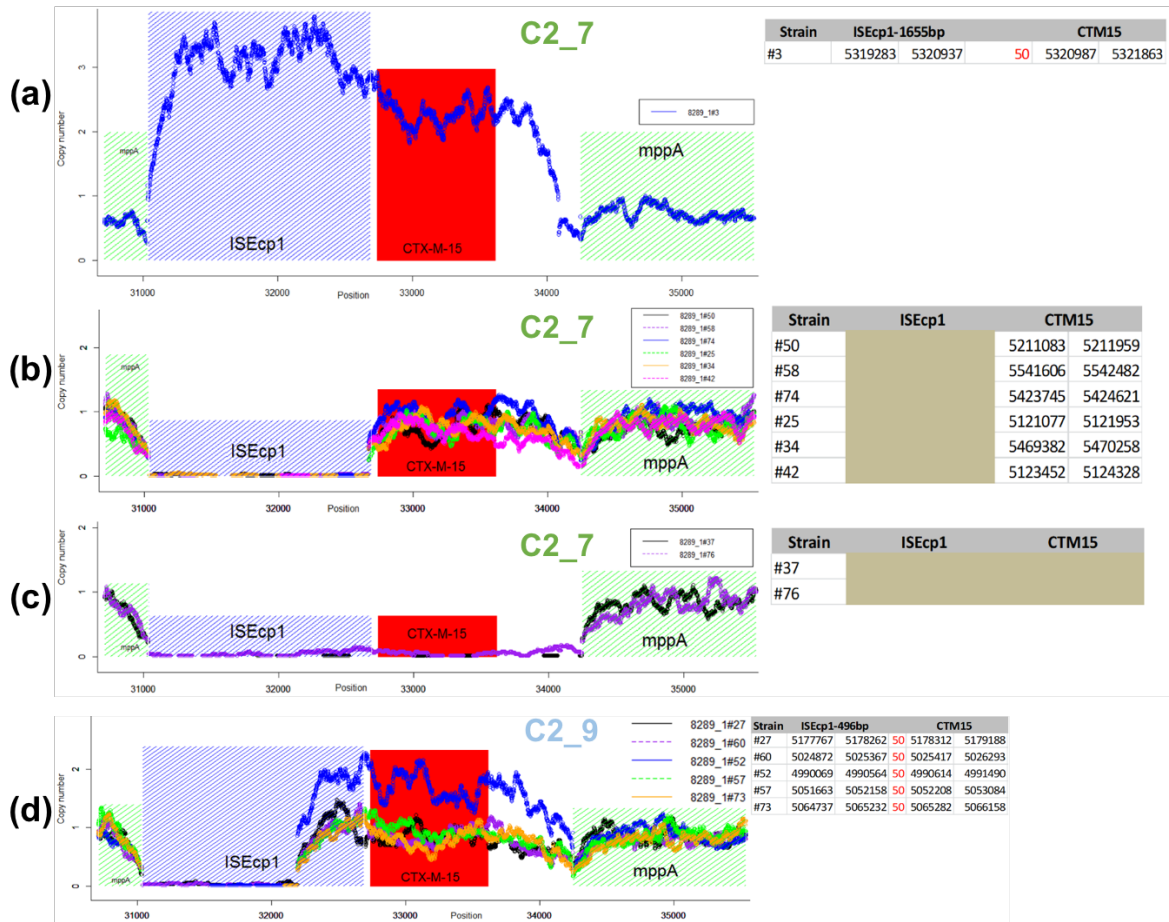

**Supplementary Figure 5. C2\_7 and C2\_9 strains with a plasmid-bound *ISEcp1-bla*<sub>CTX-M-15</sub>.** Read mapping copy number for n=9 C2\_7 and n=5 C2\_9 isolates showing one from C2\_7 (8289\_1#3, ERR191636, (a)) had a three *ISEcp1* copies (blue) and a duplicated *bla*<sub>CTX-M-15</sub> gene (red), but no contiguity if reads mapping across to *mppA* (green). These had the TU isoform p\_*bla*<sub>CTX-M-15-orf477Δ-Tn2</sub>. The majority of C2\_7 (n=6, (b)) had no *ISEcp1* and one *bla*<sub>CTX-M-15</sub> gene. Two C2\_7 isolates (c) had no *ISEcp1* and no *bla*<sub>CTX-M-14</sub> gene. All n=5 C2\_9 isolates (d) had a 496 bp *ISEcp1* element (blue) 5' of a *bla*<sub>CTX-M-15</sub> gene (red), but no contiguity if reads mapping across to *mppA* (green) unlike C2\_8. One (8289\_1#52, blue) had a partial amplification of this TU. The tables on the right show the *ISEcp1* assembly coordinates, 50 bp spacer length and *bla*<sub>CTX-M-14</sub> assembly coordinates.
